# Supplementary material
Source: PubMed Central journal article supplement (PMC1767809)
Supplement: heart_89_9_1093__1.pdf [file heart_89_9_1093__1.pdf]

**Table 1** Clinical characteristics of the study cohort

|                                                 | <b>Acute AF</b> | <b>Permanent AF</b> | <b>Healthy controls</b> | <b>p Value</b> |
|-------------------------------------------------|-----------------|---------------------|-------------------------|----------------|
| Number of subjects (n)                          | 31              | 93                  | 31                      |                |
| Age in years (mean (SD))                        | 61 (17)         | 66 (7)              | 66 (12)                 | 0.08           |
| Sex ratio (male: female)                        | 19:12           | 59:34               | 13:18                   | 0.10           |
| Antithrombotic therapy<br>(Aspirin: No therapy) | 11:20           | 34:59               | 0:31                    | 0.91           |
| Smoker: non-smoker                              | 3 :28           | 9 :84               | 5 :26                   | 1.00           |
| Hypertensive:normotensive                       | 15 :16          | 56 :37              | 3:28                    | 0.25           |
| Diabetics:non-diabetics                         | 4:27            | 9:84                | 0:31                    | 0.61           |
| CVA: no CVA                                     | 1:30            | 9:84                | 0:31                    | 0.25           |
| IHD: no IHD                                     | 5:26            | 13:80               | 0:31                    | 0.77           |
| Cardiac failure: no cardiac failure             | 2:29            | 14:79               | 0:31                    | 0.22           |

AF, atrial fibrillation; IHD, ischaemic heart disease; CVA, cerebrovascular accident.

Chi-squared test and ANOVA, all p=NS.
