# Supplementary material
Source: PubMed Central journal article supplement (PMC1767809)
Supplement: heart_89_9_1093__2.pdf [file heart_89_9_1093__2.pdf]

**Table 2** Demography and clinical characteristics of patients with acute atrial fibrillation who were subsequently restudied while in sinus rhythm

|                                     |         |
|-------------------------------------|---------|
| Number of subjects (n)              | 15      |
| Age in years (mean (SD))            | 61 (18) |
| Sex ratio (male: female)            | 10:5    |
| Aspirin: no antithrombotic therapy  | 7:8     |
| Smoker: non-smoker                  | 1:14    |
| Hypertensive:normotensive           | 6:19    |
| Diabetics:non-diabetics             | 2:13    |
| CVA: no CVA                         | 1:14    |
| IHD: no IHD                         | 2:13    |
| Cardiac failure: no cardiac failure | 0:15    |

IHD, ischaemic heart disease; CVA, cerebrovascular accident
