# Supplementary material
Source: PubMed Central journal article supplement (PMC1767809)
Supplement: heart_89_9_1093__3.pdf [file heart_89_9_1093__3.pdf]

**Table 3** Platelet activation, haemorheology, and thrombogenesis in 15 patients during AF and later sinus rhythm

|                                        | <b>In atrial fibrillation</b> | <b>In sinus rhythm</b> | <b>p Value</b> |
|----------------------------------------|-------------------------------|------------------------|----------------|
| Blood platelets (x 10 <sup>9</sup> /l) | 271 (56)                      | 263 (78)               | 0.77           |
| Hematocrit (%)                         | 43 (6)                        | 42 (5)                 | 0.62           |
| Fibrinogen (g/l)                       | 3.0 (0.9)                     | 3.0 (0.4)              | 0.90           |
| Plasma viscosity (mpa)                 | 1.8 (0.1)                     | 1.7 (0.1)              | 0.37           |
| $\beta$ -TG (IU/ml)                    | 75 (59–109)                   | 64 (55–88)             | 0.38           |
| Soluble P-selectin (ng/ml)             | 40 (7)                        | 36 (13)                | 0.31           |
| <i>Platelet aggregation</i>            |                               |                        |                |
| <i>in response to (agonist)</i>        |                               |                        |                |
| • ADP                                  | 65 (47–83)                    | 66 (22–75)             | 0.21           |
| • Collagen                             | 51 (23–67)                    | 12 (05–67)             | 0.09           |
| • Adrenaline (epinephrine)             | 38 (27–49)                    | 38 (21–68)             | 0.41           |
| • Thrombin                             | 27 (0–55)                     | 48 (04–75)             | 0.20           |

Results are expressed as mean (standard deviation (SD) or as median (interquartile range, IQR) for the normally distributed data and skewed data respectively. Platelet aggregation expressed as median (interquartile range) percentage aggregation at 3 minutes.

Paired *t* test and paired Wilcoxon tests were used as appropriate.

$\beta$ -TG,  $\beta$  thromboglobulin; ADP, adenosine, diphosphate.
