# Supplementary material
Source: PubMed Central journal article supplement (PMC1767809)
Supplement: heart_89_9_1093__4.pdf [file heart_89_9_1093__4.pdf]

**Table 4** Acute atrial fibrillation and the effect of arrhythmia duration

|                                        | Acute atrial fibrillation |                        | p Value  |
|----------------------------------------|---------------------------|------------------------|----------|
|                                        | Group 1<br>(≤12 hours)    | Group 2<br>(>12 hours) |          |
| n                                      | 17                        | 14                     |          |
| Age in years (mean (SD))               | 60 (16)                   | 62 (18)                | 0.80     |
| Sex (M: F)                             | 11:6                      | 8:6                    | 0.67     |
| Duration of AF hours                   | 8 (3)                     | 26 (13)                | <0.0001* |
| Aspirin: no antithrombotic therapy     | 7:10                      | 4:10                   | 0.47     |
| Smoker: non-smoker                     | 2:15                      | 1:13                   | 0.67     |
| Hypertensive: normotensive             | 9:8                       | 6:8                    | 0.58     |
| Diabetics: non-diabetics               | 3:14                      | 1:13                   | 0.39     |
| CVA: no CVA                            | 0:17                      | 1:13                   | ---      |
| IHD: no IHD                            | 3:14                      | 2:12                   | 0.80     |
| Cardiac failure: no cardiac failure    | 2:15                      | 0:14                   | ---      |
| Blood platelets (x 10 <sup>9</sup> /l) | 277 (69)                  | 285 (100)              | 0.81     |
| Hematocrit (%)                         | 46 (3)                    | 44 (6)                 | 0.23     |
| Fibrinogen (g/l)                       | 3.3 (0.8)                 | 2.5 (0.4)              | 0.02     |
| Plasma viscosity (mpa)                 | 1.8 (0.1)                 | 1.7 (0.1)              | 0.13     |
| β-TG (IU/ml)                           | 78 (58–110)               | 93 (63–138)            | 0.49     |
| Soluble P-selectin (ng/ml)             | 39 (8)                    | 38 (6)                 | 0.75     |
| Fibrin D-dimer (ng/ml)                 | 710 (440–1200)            | 605 (405–2070)         | 0.90     |
| <i>Platelet aggregation</i>            |                           |                        |          |
| <i>in response to (agonist)</i>        |                           |                        |          |
| • ADP                                  | 73 (66-84)                | 68 (36-84)             | 0.65     |
| • Collagen                             | 58 (21-82)                | 26 (20-60)             | 0.15     |
| • Adrenaline (epinephrine)             | 30 (24-46)                | 48 (34-50)             | 0.06     |
| • Thrombin                             | 21 (01-48)                | 12 (03-85)             | 0.69     |

Unpaired *t* test, Mann Whitney *U* test and chi squared test, as appropriate. Results are expressed as numbers, and as mean (standard deviation (SD) or median (interquartile range, IQR). Values of platelet aggregation are expressed as median (interquartile range) percentage aggregation at 3 minutes.

AF, atrial fibrillation; IHD, ischaemic heart disease; CVA, cerebrovascular accident;  $\beta$ -TG,  $\beta$  thromboglobulin; ADP, adenosine diphosphate.
