# Supplementary material
Source: PubMed Central journal article supplement (PMC1767809)
Supplement: heart_89_9_1093__5.pdf [file heart_89_9_1093__5.pdf]

**Table 5** Effect of prior aspirin therapy on the total cohort of AF (acute + permanent) patients

|                                                      | <b>Acute + Chronic atrial fibrillation</b> |                           | <b>p Value</b> |
|------------------------------------------------------|--------------------------------------------|---------------------------|----------------|
|                                                      | <b>Aspirin</b>                             | <b>No aspirin therapy</b> |                |
| N                                                    | 45                                         | 79                        |                |
| Age in years (mean (SD))                             | 68 (8)                                     | 63 (11)                   | 0.01           |
| Sex (M: F)                                           | 26:19                                      | 52:27                     | 0.37           |
| Smoker: non-smoker                                   | 5 :40                                      | 7 :72                     | 0.68           |
| Hypertensive:normotensive                            | 27 :18                                     | 44 :35                    | 0.64           |
| Diabetics:non-diabetics                              | 3:42                                       | 10:69                     | 0.30           |
| CVA: no CVA                                          | 4:41                                       | 6:73                      | 0.80           |
| IHD: no IHD                                          | 13:32                                      | 5:74                      | 0.001          |
| Cardiac failure: no cardiac failure                  | 10:35                                      | 6:73                      | 0.02           |
| Blood platelets (x 10 <sup>9</sup> /l)               | 279 (73)                                   | 262 (78)                  | 0.22           |
| Hematocrit (%)                                       | 43 (5)                                     | 44 (4)                    | 0.31           |
| Fibrinogen (g/l)                                     | 2.8 (0.5)                                  | 2.7 (0.7)                 | 0.69           |
| Plasma viscosity (mpa)                               | 1.7 (0.1)                                  | 1.7 (0.1)                 | 0.80           |
| β-TG (IU/ml)                                         | 89 (71–112)                                | 83 (56–124)               | 0.52           |
| Soluble P-selectin (ng/ml)                           | 37 (7)                                     | 40 (10)                   | 0.05           |
| Fibrin D-dimer (ng/ml)                               | 1150 (805–5813)                            | 900 (553–1750)            | <b>0.04</b>    |
| <i>Platelet aggregation in response to (agonist)</i> |                                            |                           |                |
| • ADP                                                | 63 (51–77)                                 | 69 (51–80)                | 0.89           |
| • Collagen                                           | 31 (10–56)                                 | 28 (8–64)                 | 0.63           |
| • Epinephrine                                        | 36 (21–50)                                 | 46 (28–60)                | 0.06           |
| • Thrombin                                           | 36 (0–65)                                  | 56 (9–80)                 | <b>0.04</b>    |

Unpaired *t* test, Mann Whitney *U* test and chi squared test, as appropriate. Results are expressed as numbers, and as mean (standard deviation (SD) or median (interquartile range, IQR). Values of platelet aggregation are expressed as median (interquartile range) percentage aggregation at 3 minutes.

AF, atrial fibrillation; IHD, ischaemic heart disease, CVA, cerebrovascular accident, β-TG, β thromboglobulin, ADP, adenosine diphosphate.
